# Supplementary material for: Density functional study of palladium clusters
Source: Royal Society of Chemistry journal article supplement (doi:10.1039/b303347c), 2003-01-01
Supplement: b303347c.zip [file b303347c.zip]

## Supplementary Material

Table 1: Summary of calculated  $\text{Pd}_n$  clusters,  $n = 4 - 309$ . Symmetry G, spin state, total energy (Hartree) and file name containing Cartesian coordinates ( $\text{\AA}$ ).

| n | G        | State <sup>a</sup> | Energy       | File name |
|---|----------|--------------------|--------------|-----------|
| 4 | $D_{2d}$ | $^3A_2$            | -512.059831  | pd4.1     |
|   | $T_d$    | $^3T_1$            | -512.059512  | pd4.2     |
|   | $D_{4h}$ | $^3A_{2u}$         | -512.033214  | pd4.3     |
| 5 | $D_{3h}$ | $^3A'_2$           | -640.095779  | pd5.1     |
|   | $D_{5h}$ | $^3A''_2$          | -640.033262  | pd5.2     |
| 6 | $D_{4h}$ | $^3B_{1g}$         | -768.144562  | pd6.1     |
|   | $O_h$    | $^3T_{2g}$         | -768.143654  | pd6.2     |
|   | $D_{3d}$ | $^3A_{1g}$         | -768.143561  | pd6.3     |
| 7 | $D_{5h}$ | $^3A'_2$           | -896.175072  | pd7.1     |
|   | $C_s$    | $^3A'$             | -896.174055  | pd7.2     |
|   | $C_1$    | $^3A$              | -896.173348  | pd7.3     |
|   | $D_{3h}$ | $^5A_1''$          | -896.164777  | pd7.4     |
|   | $D_{3d}$ | $^5A_{1u}$         | -896.157383  | pd7.5     |
| 8 | $D_{2d}$ | $^3A_2$            | -1024.223321 | pd8.1     |
|   | $C_s$    | $^5A'$             | -1024.219442 | pd8.2     |
|   | $C_s$    | $^5A''$            | -1024.217834 | pd8.3     |
|   | $C_2$    | $^5A$              | -1024.217428 | pd8.4     |
|   | $D_{3d}$ | $^5A_{2g}$         | -1024.216482 | pd8.5     |
|   | $C_{2v}$ | $^1A_1$            | -1024.216707 | pd8.6     |
|   | $C_s$    | $^3A''$            | -1024.215898 | pd8.7     |
|   | $C_s$    | $^5A''$            | -1024.213969 | pd8.8     |
|   | $D_{4d}$ | $^1A_1$            | -1024.213923 | pd8.9     |
|   | $C_{2v}$ | $^5B_1$            | -1024.208782 | pd8.10    |
|   | $T_d$    | $^3A_2$            | -1024.198951 | pd8.11    |
| 9 | $C_{2v}$ | $^5A_2$            | -1152.269348 | pd9.1     |
|   | $C_s$    | $^5A''$            | -1152.267379 | pd9.2     |
|   | $C_s$    | $^5A_1$            | -1152.266129 | pd9.3     |
|   | $C_2$    | $^5A$              | -1152.263516 | pd9.4     |
|   | $C_1$    | $^5A$              | -1152.262769 | pd9.5     |

| n  | G        | State <sup>a</sup> | Energy       | File name |
|----|----------|--------------------|--------------|-----------|
|    | $C_2$    | ${}^5A$            | -1152.262575 | pd9.6     |
|    | $C_{2v}$ | ${}^5B_2$          | -1152.260313 | pd9.7     |
|    | $D_{3h}$ | ${}^1A_1$          | -1152.259949 | pd9.8     |
|    | $C_{2v}$ | ${}^5A_1$          | -1152.257014 | pd9.9     |
| 10 | $D_{2h}$ | ${}^5A_{2g}$       | -1280.320755 | pd10.1    |
|    | $C_{3v}$ | ${}^7A_2$          | -1280.320010 | pd10.2    |
|    | $C_{2v}$ | ${}^3B_2$          | -1280.315265 | pd10.3    |
|    | $C_s$    | ${}^7A'$           | -1280.313569 | pd10.4    |
|    | $C_{3v}$ | ${}^5A_1$          | -1280.302955 | pd10.5    |
|    | $T_d$    | ${}^9A_2$          | -1280.298719 | pd10.6    |
|    | $C_{4v}$ | ${}^3B_2$          | -1280.294800 | pd10.7    |
|    | $T_d$    | ${}^3A_2$          | -1280.294420 | pd10.8    |
|    | $D_{5d}$ | ${}^5A_{1u}$       | -1280.268205 | pd10.9    |
| 11 | $C_s$    | ${}^7A''$          | -1408.372796 | pd11.1    |
|    | $D_{3h}$ | ${}^7A'_2$         | -1408.371953 | pd11.2    |
|    | $C_1$    | ${}^5A$            | -1408.367953 | pd11.3    |
|    | $C_s$    | ${}^9A'$           | -1408.366116 | pd11.4    |
|    | $C_s$    | ${}^7A''$          | -1408.365439 | pd11.5    |
|    | $C_{2v}$ | ${}^7A_2$          | -1408.364602 | pd11.6    |
|    | $C_{2v}$ | ${}^7B_2$          | -1408.364443 | pd11.7    |
|    | $C_s$    | ${}^7A'$           | -1408.363361 | pd11.8    |
|    | $C_1$    | ${}^1A$            | -1408.360111 | pd11.9    |
|    | $C_2$    | ${}^3B$            | -1408.356524 | pd11.10   |
|    | $D_{5d}$ | ${}^5E_{2u}$       | -1408.350580 | pd11.11   |
|    | $C_s$    | ${}^5A'$           | -1408.346146 | pd11.12   |
|    | $D_{3h}$ | ${}^1A_1$          | -1408.341223 | pd11.13   |
|    | $D_{2h}$ | ${}^5A_{2u}$       | -1408.335600 | pd11.14   |
|    | $T_d$    | ${}^3T_1$          | -1408.296506 | pd11.15   |
| 12 | $D_{2d}$ | ${}^7B_2$          | -1536.429332 | pd12.1    |
|    | $C_1$    | ${}^9A$            | -1536.422695 | pd12.2    |
|    | $C_s$    | ${}^9A''$          | -1536.413596 | pd12.3    |
|    | $C_s$    | ${}^9A''$          | -1536.413595 | pd12.4    |
|    | $C_{5v}$ | ${}^5A_1$          | -1536.408222 | pd12.5    |
|    | $D_{3d}$ | ${}^3A_{2g}$       | -1536.407579 | pd12.6    |
|    | $O_h$    | ${}^7A_{1u}$       | -1536.353518 | pd12.7    |

| n  | G        | State <sup>a</sup> | Energy       | File name |
|----|----------|--------------------|--------------|-----------|
| 13 | $D_{3d}$ | ${}^9A_{2u}$       | -1664.470686 | pd13.1    |
|    | $I_h$    | FON                | -1664.465815 | pd13.2    |
|    | $C_{2v}$ | ${}^9A_2$          | -1664.465153 | pd13.3    |
|    | $D_{4h}$ | ${}^5B_{2g}$       | -1664.462316 | pd13.4    |
|    | $D_{5h}$ | ${}^9E''_1$        | -1664.461564 | pd13.5    |
|    | $D_{3h}$ | ${}^7A'_2$         | -1664.458542 | pd13.6    |
|    | $C_{2v}$ | ${}^3B_1$          | -1664.455237 | pd13.7    |
|    | $O_h$    | ${}^7A_{1u}$       | -1664.447901 | pd13.8    |
| 15 | $C_{2v}$ | ${}^9B_2$          | -1920.586779 | pd15.1    |
|    | $O_h$    | ${}^9A_{1g}$       | -1920.581269 | pd15.2    |
| 16 | $C_s$    | ${}^9A'$           | -2048.646335 | pd16.1    |
|    | $C_3$    | ${}^3A$            | -2048.634468 | pd16.2    |
| 19 | $O_h$    | ${}^9E_g$          | -2432.846025 | pd19.1    |
|    | $D_{5h}$ | ${}^9A'_1$         | -2432.806386 | pd19.2    |
| 23 | $D_{5h}$ | ${}^{15}A''_1$     | -2945.065793 | pd23.1    |
|    | $D_{3h}$ | ${}^9A''_1$        | -2945.034895 | pd23.2    |
|    | $D_{3h}$ | ${}^9A'_1$         | -2945.031923 | pd23.3    |
| 25 | $C_{2v}$ | ${}^{11}B_1$       | -3201.142426 | pd25.1    |
| 26 | $D_{3h}$ | ${}^9A'_1$         | -3329.216945 | pd26.1    |
|    | $T_d$    | ${}^3A_2$          | -3329.186285 | pd26.2    |
| 27 | $C_{2v}$ | ${}^{11}B_2$       | -3457.251177 | pd27.1    |
| 29 | $D_{3h}$ | ${}^{11}A'$        | -3713.355336 | pd29.1    |
| 35 | $C_3$    | ${}^{15}A$         | -4481.719466 | pd35.1    |
| 38 | $O_h$    | ${}^9A_{1g}$       | -4866.003383 | pd38.1    |
| 39 | $D_{5h}$ | ${}^{11}A'_2$      | -4994.055066 | pd39.1    |
|    | $C_2$    | ${}^{19}A$         | -4994.037734 | pd39.2    |
| 44 | $O_h$    | ${}^1A_1$          | -5634.381883 | pd44.1    |
| 54 | $D_{5h}$ | ${}^{11}E'_1$      | -6914.980362 | pd54.1    |
| 55 | $C_{2h}$ | ${}^{15}B_g$       | -7043.088355 | pd55.1    |
|    | $I_h$    | FON                | -7043.079388 | pd55.2    |
|    | $O_h$    | ${}^{13}A_{2g}$    | -7043.077470 | pd55.3    |
|    | $D_{5h}$ | ${}^{17}E''_2$     | -7043.074104 | pd55.4    |
| 57 | $D_{3h}$ | ${}^{17}A''_2$     | -7299.188908 | pd57.1    |
| 59 | $D_3$    | ${}^{27}E$         | -7555.244565 | pd59.1    |
| 65 | $O_h$    | ${}^{35}A_{2u}$    | -8323.755635 | pd65.1    |

| n   | G        | State <sup>a</sup> | Energy        | File name |
|-----|----------|--------------------|---------------|-----------|
| 75  | $D_{5h}$ | $^{33}E_2''$       | -9604.483690  | pd75.1    |
| 85  | $O_h$    | $^{23}A_{2u}$      | -10885.164475 | pd85.1    |
|     | $D_{5h}$ | $^{25}A_2''$       | -10885.162744 | pd85.2    |
| 105 | $D_{5h}$ | FON                | -13446.464607 | pd105.1   |
| 115 | $I_h$    | FON                | -14727.007233 | pd115.1   |
| 116 | $O_h$    | FON                | -14855.337239 | pd116.1   |
| 140 | $O_h$    | $^7A_{2g}$         | -17929.106099 | pd140.1   |
| 145 | $I_h$    | FON                | -18569.054117 | pd145.1   |
| 146 | $O_h$    | $^1A_1$            | -18697.568379 | pd146.1   |
|     | $D_{5h}$ | FON                | -18697.519561 | pd146.2   |
| 147 | $I_h$    | FON                | -18825.513069 | pd147.1   |
|     | $O_h$    | FON                | -18825.511688 | pd147.2   |
|     | $D_{5h}$ | FON                | -18825.447434 | pd147.3   |
| 231 | $O_h$    | FON                | -29583.701444 | pd231.1   |
| 309 | $O_h$    | FON                | -39573.446446 | pd309.1   |
|     | $I_h$    | FON                | -39573.430754 | pd309.2   |

<sup>a</sup> FON = fractional occupation numbers.
